# Supplementary material for: Evaluation and optimization of a pilot-scale catalytic ozonation–persulfate oxidation integrated process for the pretreatment of dry-spun acrylic fiber wastewater
Source: Royal Society of Chemistry journal article supplement (doi:10.1039/c7ra03287k), 2017-01-01
Supplement: c7ra03287k1.pdf [file c7ra03287k1.pdf]

*Supplementary Information*

**Evaluation and optimization of pilot-scale catalytic ozonation - persulfate oxidation integrated process for the pretreatment of dry-spun acrylic fiber wastewater**

Zong-wei Wu, Xiao-chen Xu\*, Hong-bin Jiang, Ruo-yu Zhang, Shuai-nan Song, Chuan-qi Zhao, Feng-lin Yang\*

Key Laboratory of Industrial Ecology and Environmental Engineering (China Ministry of Education), School of Environmental Science and Technology, Dalian University of Technology, Linggong Road 2, Dalian 116024, P.R. China

\* *To whom correspondence should be addressed. E-mail address: [xxcep@dlut.edu.cn](mailto:xxcep@dlut.edu.cn)*

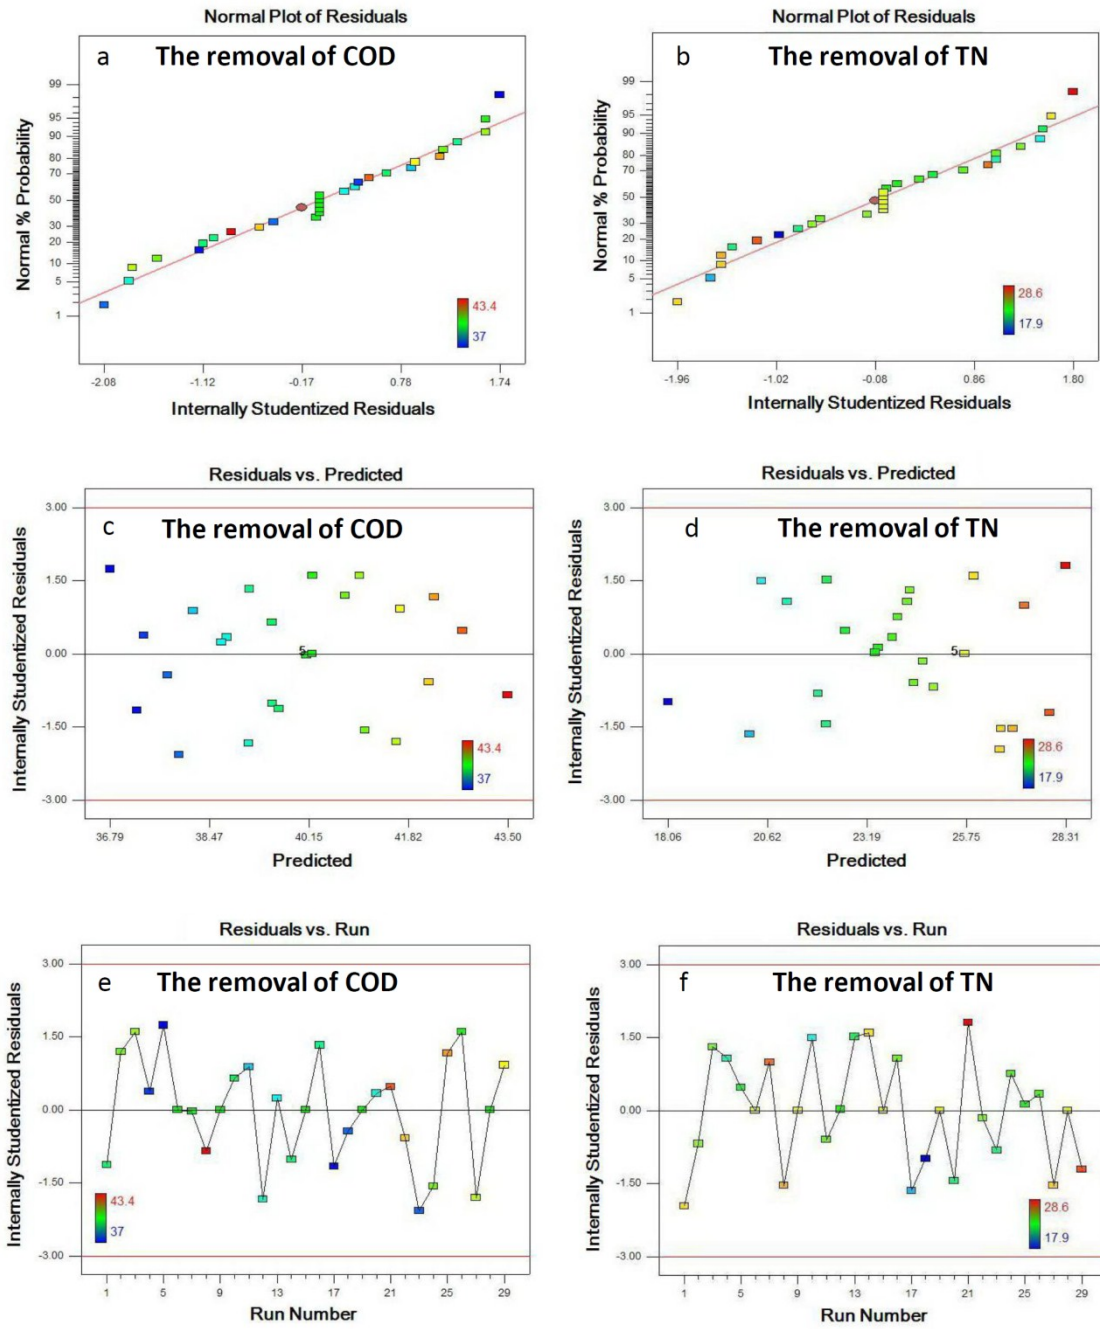

Figure S1 Residual plots for COD (a, b, c) and TN (d, e, f) removal efficiency of DAF wastewater.

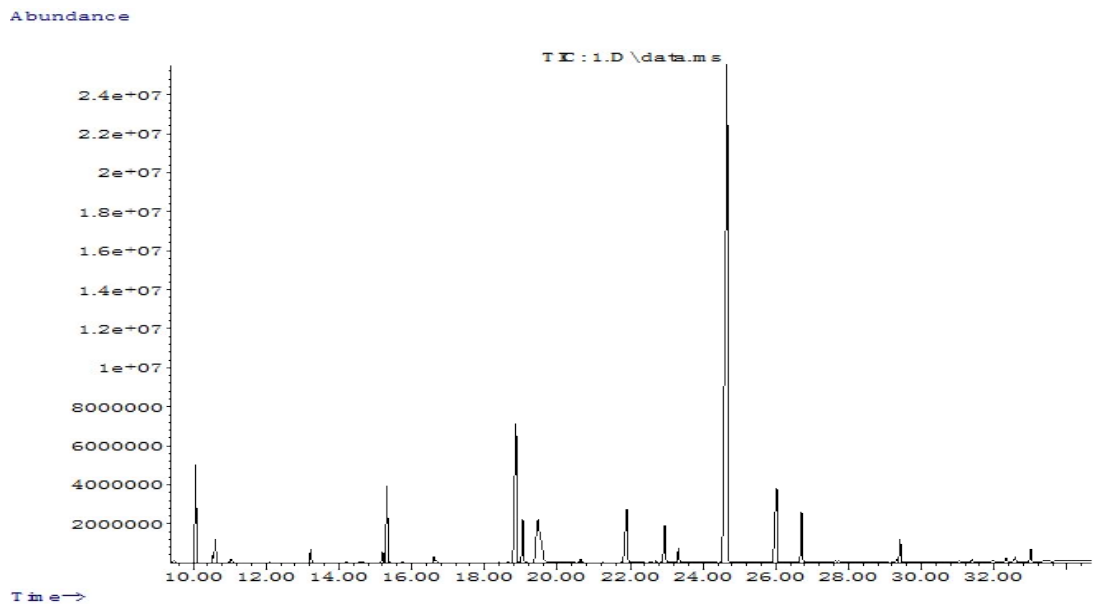

Fig S2 Total ion current chromatogram of the initial DAF wastewater.

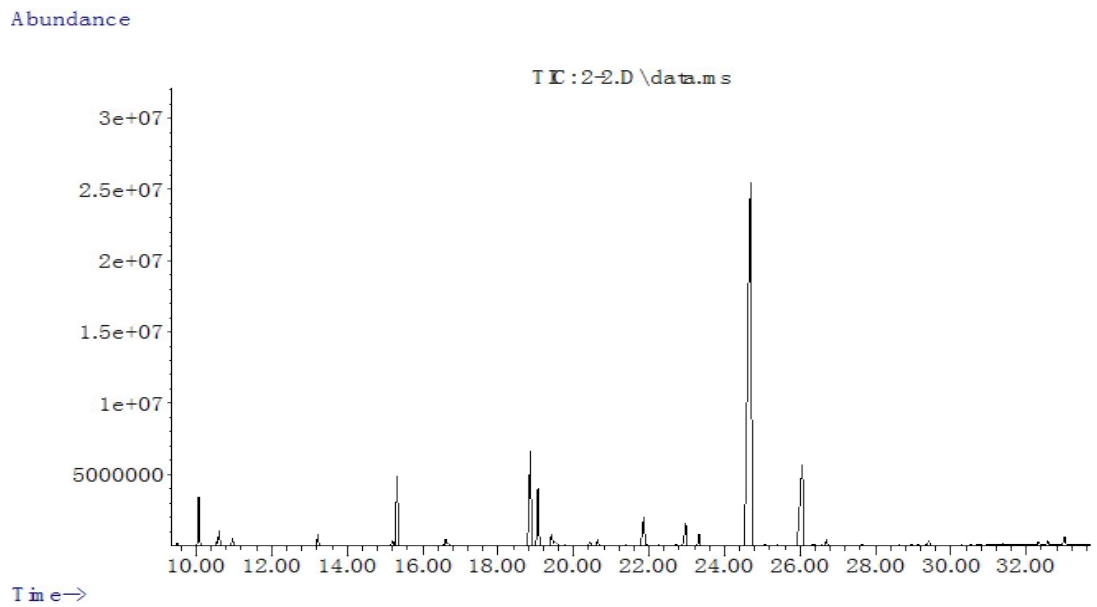

Fig S3 Total ion current chromatogram of wastewater after catalytic oxidation treatment.

Table S1 The design of RSM and its actual and predicted values.

| Number | Reaction time (h) | Reaction temperature (°C) | The addition of ozone (g/h) | The addition of persulfate (kg/t) | The removal of COD (%) |           | The removal of TN (%) |           |
|--------|-------------------|---------------------------|-----------------------------|-----------------------------------|------------------------|-----------|-----------------------|-----------|
|        |                   |                           |                             |                                   | Experimental           | Predicted | Experimental          | Predicted |
| 1      | 5.00              | 70.00                     | 30.00                       | 1.30                              | 39.5                   | 39.64     | 26.3                  | 26.61     |
| 2      | 6.00              | 60.00                     | 30.00                       | 0.50                              | 40.9                   | 40.75     | 24.8                  | 24.91     |
| 3      | 5.00              | 70.00                     | 40.00                       | 0.90                              | 41.2                   | 41.0      | 24.5                  | 24.29     |
| 4      | 4.00              | 60.00                     | 20.00                       | 0.90                              | 37.4                   | 37.35     | 21.3                  | 21.13     |
| 5      | 5.00              | 70.00                     | 20.00                       | 0.90                              | 37.0                   | 36.79     | 22.7                  | 22.63     |
| 6      | 5.00              | 60.00                     | 30.00                       | 0.90                              | 40.2                   | 40.2      | 25.7                  | 25.7      |
| 7      | 4.00              | 60.00                     | 30.00                       | 1.30                              | 40.1                   | 40.10     | 27.4                  | 27.24     |
| 8      | 6.00              | 60.00                     | 40.00                       | 0.90                              | 43.4                   | 43.5      | 26.7                  | 26.95     |
| 9      | 5.00              | 60.00                     | 30.00                       | 0.90                              | 40.2                   | 40.2      | 25.7                  | 25.7      |
| 10     | 5.00              | 50.00                     | 30.00                       | 0.50                              | 39.6                   | 39.52     | 20.7                  | 20.46     |
| 11     | 4.00              | 70.00                     | 30.00                       | 0.90                              | 38.3                   | 38.19     | 24.3                  | 24.4      |
| 12     | 5.00              | 60.00                     | 20.00                       | 1.30                              | 38.9                   | 39.13     | 23.4                  | 23.4      |
| 13     | 4.00              | 60.00                     | 30.00                       | 0.50                              | 38.7                   | 38.67     | 22.4                  | 22.16     |
| 14     | 6.00              | 70.00                     | 30.00                       | 0.90                              | 39.4                   | 39.52     | 26.2                  | 25.95     |
| 15     | 5.00              | 60.00                     | 30.00                       | 0.90                              | 40.2                   | 40.2      | 25.7                  | 25.7      |
| 16     | 6.00              | 60.00                     | 20.00                       | 0.90                              | 39.3                   | 39.14     | 24.4                  | 24.23     |
| 17     | 5.00              | 60.00                     | 20.00                       | 0.50                              | 37.1                   | 37.24     | 19.9                  | 20.16     |
| 18     | 5.00              | 50.00                     | 20.00                       | 0.90                              | 37.7                   | 37.75     | 17.9                  | 18.06     |
| 19     | 5.00              | 60.00                     | 30.00                       | 0.90                              | 40.2                   | 40.2      | 25.7                  | 25.7      |
| 20     | 4.00              | 50.00                     | 30.00                       | 0.90                              | 38.8                   | 38.76     | 21.9                  | 22.13     |
| 21     | 5.00              | 60.00                     | 40.00                       | 1.30                              | 42.8                   | 42.74     | 28.6                  | 28.31     |
| 22     | 5.00              | 50.00                     | 40.00                       | 0.90                              | 42.1                   | 42.17     | 24.6                  | 24.63     |
| 23     | 5.00              | 70.00                     | 30.00                       | 0.50                              | 37.7                   | 37.95     | 21.8                  | 21.93     |
| 24     | 6.00              | 50.00                     | 30.00                       | 0.90                              | 40.9                   | 41.09     | 24.1                  | 23.98     |
| 25     | 5.00              | 60.00                     | 40.00                       | 0.50                              | 42.4                   | 42.26     | 23.5                  | 23.48     |
| 26     | 5.00              | 50.00                     | 30.00                       | 1.30                              | 40.4                   | 40.2      | 23.9                  | 23.85     |
| 27     | 4.00              | 60.00                     | 40.00                       | 0.90                              | 41.4                   | 41.62     | 26.4                  | 26.65     |
| 28     | 5.00              | 60.00                     | 30.00                       | 0.90                              | 40.2                   | 40.2      | 25.7                  | 25.7      |
| 29     | 6.00              | 60.00                     | 30.00                       | 1.30                              | 41.8                   | 41.69     | 27.7                  | 27.89     |

Table S2 Analysis of variance table for the removal of COD.

| Source                       | Sum of Squares | df             | Mean Square | F Value | p-value Prob> F |
|------------------------------|----------------|----------------|-------------|---------|-----------------|
| Model                        | 80.77          | 14             | 5.77        | 160.74  | < 0.0001        |
| A-Reaction time              | 10.08          | 1              | 10.08       | 280.93  | < 0.0001        |
| B-Reaction temperature       | 3.41           | 1              | 3.41        | 95.10   | < 0.0001        |
| C-The addition of ozone      | 55.90          | 1              | 55.90       | 1557.44 | < 0.0001        |
| D-The addition of persulfate | 4.20           | 1              | 4.20        | 117.04  | < 0.0001        |
| AB                           | 0.25           | 1              | 0.25        | 6.97    | 0.0194          |
| AC                           | 2.500E-003     | 1              | 2.500E-003  | 0.070   | 0.7957          |
| AD                           | 0.063          | 1              | 0.063       | 1.74    | 0.2081          |
| BC                           | 0.010          | 1              | 0.010       | 0.28    | 0.6059          |
| BD                           | 0.25           | 1              | 0.25        | 6.97    | 0.0194          |
| CD                           | 0.49           | 1              | 0.49        | 13.65   | 0.0024          |
| A <sup>2</sup>               | 0.045          | 1              | 0.045       | 1.25    | 0.2815          |
| B <sup>2</sup>               | 5.16           | 1              | 5.16        | 143.68  | < 0.0001        |
| C <sup>2</sup>               | 0.095          | 1              | 0.095       | 2.64    | 0.1266          |
| D <sup>2</sup>               | 2.815E-003     | 1              | 2.815E-003  | 0.078   | 0.7835          |
| Residual                     | 0.50           | 14             | 0.036       |         |                 |
| Lack of Fit                  | 0.50           | 10             | 0.050       |         |                 |
| Pure Error                   | 0.000          | 4              | 0.000       |         |                 |
| Cor Total                    | 81.27          | 28             |             |         |                 |
| Std. Dev.                    | 0.19           | R-Squared      | 0.9938      |         |                 |
| Mean                         | 19.92          | Adj R-Squared  | 0.9876      |         |                 |
| C.V. %                       | 0.95           | Pred R-Squared | 0.9644      |         |                 |
| PRESS                        | 2.89           | Adeq Precision | 49.295      |         |                 |

Table S3 Analysis of variance table for the removal of TN.

| Source                       | Sum of Squares | df             | Mean Square | F Value | p-value Prob> F |
|------------------------------|----------------|----------------|-------------|---------|-----------------|
| Model                        | 168.87         | 14             | 12.06       | 198.08  | < 0.0001        |
| A-Reaction time              | 8.67           | 1              | 8.67        | 142.38  | < 0.0001        |
| B-Reaction temperature       | 13.44          | 1              | 13.44       | 220.73  | < 0.0001        |
| C-The addition of ozone      | 50.84          | 1              | 50.84       | 834.92  | < 0.0001        |
| D-The addition of persulfate | 48.80          | 1              | 48.80       | 801.46  | < 0.0001        |
| AB                           | 0.023          | 1              | 0.023       | 0.37    | 0.5530          |
| AC                           | 1.96           | 1              | 1.96        | 32.19   | < 0.0001        |
| AD                           | 1.10           | 1              | 1.10        | 18.11   | 0.0008          |
| BC                           | 6.00           | 1              | 6.00        | 98.57   | < 0.0001        |
| BD                           | 0.42           | 1              | 0.42        | 6.94    | 0.0196          |
| CD                           | 0.64           | 1              | 0.64        | 10.51   | 0.0059          |
| A <sup>2</sup>               | 0.91           | 1              | 0.91        | 14.98   | 0.0017          |
| B <sup>2</sup>               | 24.98          | 1              | 24.98       | 410.26  | < 0.0001        |
| C <sup>2</sup>               | 11.60          | 1              | 11.60       | 190.56  | < 0.0001        |
| D <sup>2</sup>               | 1.79           | 1              | 1.79        | 29.36   | < 0.0001        |
| Residual                     | 0.85           | 14             | 0.061       |         |                 |
| Lack of Fit                  | 0.85           | 10             | 0.085       |         |                 |
| Pure Error                   | 0.000          | 4              | 0.000       |         |                 |
| Cor Total                    | 169.72         | 28             |             |         |                 |
| Std. Dev.                    | 0.25           | R-Squared      | 0.9950      |         |                 |
| Mean                         | 24.27          | Adj R-Squared  | 0.9900      |         |                 |
| C.V. %                       | 1.02           | Pred R-Squared | 0.9711      |         |                 |
| PRESS                        | 4.91           | Adeq Precision | 57.779      |         |                 |

Table S4 Chemical composition analysis of the initial DAF wastewater.

| No | Compound                              | Retention Time<br>(min) | Formula                                        | Peak area  | March |
|----|---------------------------------------|-------------------------|------------------------------------------------|------------|-------|
| 1  | Ethyl Acetate                         | 10.06                   | C <sub>4</sub> H <sub>8</sub> O <sub>2</sub>   | 139914155  | 95.4  |
| 2  | Trichloromethane                      | 10.53                   | CHCl <sub>3</sub>                              | 11780263   | 97.7  |
| 3  | Tetrahydrofuran                       | 10.60                   | C <sub>4</sub> H <sub>8</sub> O                | 34347508   | 95.9  |
| 4  | 2,2-Dimethoxy-propane                 | 10.96                   | C <sub>5</sub> H <sub>12</sub> O <sub>2</sub>  | 1279925    | 88    |
| 5  | Acetic acid                           | 11.05                   | C <sub>2</sub> H <sub>4</sub> O <sub>2</sub>   | 6591368    | 95.2  |
| 6  | 1,1-Dimethoxy-propane                 | 12.09                   | C <sub>5</sub> H <sub>12</sub> O <sub>2</sub>  | 760356     | 84    |
| 7  | 1-Butanol                             | 12.30                   | C <sub>4</sub> H <sub>10</sub> O               | 298596     | 87.2  |
| 8  | Dimethoxy-methane                     | 13.22                   | C <sub>3</sub> H <sub>8</sub> O <sub>2</sub>   | 18385137   | 85.7  |
| 9  | Propanoic acid                        | 14.18                   | C <sub>3</sub> H <sub>6</sub> O <sub>2</sub>   | 1213664    | 86.5  |
| 10 | 2-Methoxytetrahydrofuran              | 14.54                   | C <sub>5</sub> H <sub>10</sub> O <sub>2</sub>  | 757438     | 89.2  |
| 11 | 2-Propenoic acid                      | 14.61                   | C <sub>3</sub> H <sub>4</sub> O <sub>2</sub>   | 3342516    | 92.8  |
| 12 | Toluene                               | 15.19                   | C <sub>7</sub> H <sub>8</sub>                  | 17253537   | 95.4  |
| 13 | 1,3-Diazine                           | 15.32                   | C <sub>4</sub> H <sub>4</sub> N <sub>2</sub>   | 118582547  | 96    |
| 14 | Tetraethylene glycol                  | 15.75                   | C <sub>8</sub> H <sub>18</sub> O <sub>5</sub>  | 793473     | 77    |
| 15 | Acetic acid, butyl ester              | 16.61                   | C <sub>6</sub> H <sub>12</sub> O <sub>2</sub>  | 8582803    | 96.5  |
| 16 | 4-Methyl-3-penten-2-one               | 16.67                   | C <sub>6</sub> H <sub>10</sub> O               | 3125538    | 91.5  |
| 17 | Ethylbenzene                          | 18.40                   | C <sub>8</sub> H <sub>10</sub>                 | 537918     | 85.8  |
| 18 | 1,3-Dimethyl-benzene                  | 18.65                   | C <sub>8</sub> H <sub>10</sub>                 | 1151045    | 92.4  |
| 19 | (E)-2-Butenedinitrile                 | 18.86                   | C <sub>4</sub> H <sub>2</sub> N <sub>2</sub>   | 291358469  | 96.3  |
| 20 | 4-Hydroxy-4-methyl-2-pentanone        | 19.05                   | C <sub>6</sub> H <sub>12</sub> O <sub>2</sub>  | 68007131   | 92.7  |
| 21 | 1H-Pyrazole                           | 19.47                   | C <sub>3</sub> H <sub>4</sub> N <sub>2</sub>   | 204894871  | 97.2  |
| 22 | 4-Methoxy-4-methyl-2-pentanone        | 20.64                   | C <sub>7</sub> H <sub>14</sub> O <sub>2</sub>  | 7568376    | 95    |
| 23 | 4-Oxobutanenitrile                    | 21.90                   | C <sub>4</sub> H <sub>5</sub> NO               | 128224798  | 91.6  |
| 24 | 2-Ethyl-2,4,5-trimethyl-1,3-dioxolane | 22.27                   | C <sub>8</sub> H <sub>16</sub> O <sub>2</sub>  | 1404986    | 64.8  |
| 25 | 3-Aminoacrylonitriles                 | 22.71                   | C <sub>3</sub> H <sub>4</sub> N <sub>2</sub>   | 2917493    | 83.7  |
| 26 | Methylene-propanedinitrile            | 22.95                   | C <sub>4</sub> H <sub>2</sub> N <sub>2</sub>   | 66651689   | 90.2  |
| 27 | 4-Pyridinecarbonitrile                | 23.32                   | C <sub>6</sub> H <sub>4</sub> N <sub>2</sub>   | 21560069   | 96.6  |
| 28 | Acetyl                                | 23.75                   | C <sub>11</sub> H <sub>12</sub> N <sub>2</sub> | 966745     | 80.3  |
| 29 | 3-Pyridinecarbonitrile                | 24.66                   | C <sub>6</sub> H <sub>4</sub> N <sub>2</sub>   | 1272910771 | 95.6  |
| 30 | 2-Pentenedinitrile                    | 24.86                   | C <sub>5</sub> H <sub>4</sub> N <sub>2</sub>   | 884316     | 79.4  |
| 31 | 2-Butanone, 3-hydroxy-                | 25.07                   | C <sub>4</sub> H <sub>8</sub> O <sub>2</sub>   | 1338502    | 90.1  |
| 32 | Pentanedinitrile                      | 25.39                   | C <sub>5</sub> H <sub>6</sub> N <sub>2</sub>   | 3419030    | 92.3  |
| 33 | Butanedinitrile                       | 26.02                   | C <sub>4</sub> H <sub>4</sub> N <sub>2</sub>   | 329529167  | 96.3  |
| 34 | 2,3-Dimethyl- butanedinitrile         | 26.38                   | C <sub>6</sub> H <sub>8</sub> N <sub>2</sub>   | 4389537    | 86.6  |
| 35 | 2-Methyl- pentanedinitrile            | 26.57                   | C <sub>6</sub> H <sub>8</sub> N <sub>2</sub>   | 2405294    | 72.9  |
| 36 | 2-Pyrimidinol                         | 26.71                   | C <sub>4</sub> H <sub>4</sub> N <sub>2</sub> O | 75919917   | 81.3  |
| 37 | 4-(Aminomethyl)pyridine               | 27.64                   | C <sub>6</sub> H <sub>8</sub> N <sub>2</sub>   | 1753546    | 71.8  |



---

|    |                               |       |                                                |          |      |
|----|-------------------------------|-------|------------------------------------------------|----------|------|
| 38 | 4-Aminonicotinonitrile        | 27.73 | C <sub>6</sub> H <sub>5</sub> N <sub>3</sub>   | 1695558  | 67.3 |
| 39 | 5-Azabenzimidazole            | 29.32 | C <sub>6</sub> H <sub>5</sub> N <sub>3</sub>   | 3310281  | 85.2 |
| 40 | 3-Imidazol-1-ylpropanenitrile | 29.42 | C <sub>6</sub> H <sub>7</sub> N <sub>3</sub>   | 35067015 | 87.9 |
| 41 | 3-Pyridineacetonitrile        | 31.39 | C <sub>7</sub> H <sub>6</sub> N <sub>2</sub>   | 4098948  | 93.7 |
| 42 | 3-Hexenedinitrile             | 31.56 | C <sub>6</sub> H <sub>6</sub> N <sub>2</sub>   | 1183489  | 91.8 |
| 43 | 1,3,8-Triazanaphthalene       | 31.96 | C <sub>7</sub> H <sub>5</sub> N <sub>3</sub>   | 2979977  | 81.9 |
| 44 | 1,4-Benzenedicarbonitrile     | 32.31 | C <sub>8</sub> H <sub>4</sub> N <sub>2</sub>   | 8385614  | 94.5 |
| 45 | 1,3-Benzenedicarbonitrile     | 32.57 | C <sub>8</sub> H <sub>4</sub> N <sub>2</sub>   | 8464372  | 96.1 |
| 46 | 2,3-Dicyanopropionamide       | 33.00 | C <sub>5</sub> H <sub>5</sub> N <sub>3</sub> O | 18948088 | 85.1 |

---

Table S5 Chemical composition analysis of wastewater after catalytic oxidation treatment.

| No | Compound                              | Retention Time (min) | Formula                                        | Peak area | March |
|----|---------------------------------------|----------------------|------------------------------------------------|-----------|-------|
| 1  | Ethyl Acetate                         | 10.07                | C <sub>4</sub> H <sub>8</sub> O <sub>2</sub>   | 93409141  | 95.4  |
| 2  | Trichloromethane                      | 10.53                | CHCl <sub>3</sub>                              | 7035379   | 97.7  |
| 3  | Tetrahydrofuran                       | 10.61                | C <sub>4</sub> H <sub>8</sub> O                | 29151671  | 95.9  |
| 4  | 2,2-Dimethoxy-propane                 | 10.96                | C <sub>5</sub> H <sub>12</sub> O <sub>2</sub>  | 14669281  | 88    |
| 5  | 2-(1-methylethoxy)- Ethanol           | 11.08                | C <sub>5</sub> H <sub>12</sub> O <sub>2</sub>  | 640176    | 70.8  |
| 6  | Acetic acid                           | 12.09                | C <sub>2</sub> H <sub>4</sub> O <sub>2</sub>   | 452463    | 95.2  |
| 7  | 1,1-Dimethoxy-propane                 | 12.30                | C <sub>5</sub> H <sub>12</sub> O <sub>2</sub>  | 429236    | 84    |
| 8  | 1-Butanol                             | 13.22                | C <sub>4</sub> H <sub>10</sub> O               | 22400193  | 87.2  |
| 9  | Dimethoxy-methane                     | 13.93                | C <sub>3</sub> H <sub>8</sub> O <sub>2</sub>   | 594527    | 85.7  |
| 10 | 2-Methoxytetrahydrofuran              | 14.54                | C <sub>5</sub> H <sub>10</sub> O <sub>2</sub>  | 840538    | 89.2  |
| 11 | Toluene                               | 15.19                | C <sub>7</sub> H <sub>8</sub>                  | 11260853  | 95.4  |
| 12 | 1,3-Diazine                           | 15.32                | C <sub>4</sub> H <sub>4</sub> N <sub>2</sub>   | 156252487 | 96    |
| 13 | Tetraethylene glycol                  | 15.75                | C <sub>8</sub> H <sub>18</sub> O <sub>5</sub>  | 839353    | 77    |
| 14 | Formamide                             | 15.88                | CH <sub>3</sub> NO                             | 1270827   | 96.2  |
| 15 | 3-Nitropropanoic acid                 | 16.55                | C <sub>3</sub> H <sub>5</sub> NO <sub>4</sub>  | 2111076   | 82.3  |
| 16 | Acetic acid, butyl ester              | 16.61                | C <sub>6</sub> H <sub>12</sub> O <sub>2</sub>  | 12433965  | 96.5  |
| 17 | 4-Methyl-3-penten-2-one               | 16.67                | C <sub>6</sub> H <sub>10</sub> O               | 4894581   | 91.5  |
| 18 | 2-Ethoxy-2-methoxy- propane           | 17.68                | C <sub>6</sub> H <sub>14</sub> O <sub>2</sub>  | 713202    | 72.1  |
| 19 | Ethylbenzene                          | 18.40                | C <sub>8</sub> H <sub>10</sub>                 | 697061    | 85.8  |
| 20 | 1,3-Dimethyl-benzene                  | 18.65                | C <sub>8</sub> H <sub>10</sub>                 | 1390882   | 92.4  |
| 21 | (E)-2-Butenedinitrile                 | 18.86                | C <sub>4</sub> H <sub>2</sub> N <sub>2</sub>   | 195248668 | 96.3  |
| 22 | 4-Hydroxy-4-methyl-2-pentanone        | 19.06                | C <sub>6</sub> H <sub>12</sub> O <sub>2</sub>  | 129529727 | 92.7  |
| 23 | 1H-Pyrazole                           | 19.41                | C <sub>3</sub> H <sub>4</sub> N <sub>2</sub>   | 44555379  | 97.2  |
| 24 | 2-Hydroxy-propanenitrile              | 19.75                | C <sub>3</sub> H <sub>5</sub> NO               | 2814513   | 89.6  |
| 25 | Hydroxy-acetonitrile                  | 20.43                | C <sub>2</sub> H <sub>3</sub> NO               | 10486104  | 91.8  |
| 26 | 4-Methoxy-4-methyl-2-pentanone        | 20.64                | C <sub>7</sub> H <sub>14</sub> O <sub>2</sub>  | 13484907  | 95    |
| 27 | 3-Hydroxy- propanenitrile             | 21.38                | C <sub>3</sub> H <sub>5</sub> NO               | 2838458   | 92.6  |
| 28 | 4-Oxobutanenitrile                    | 21.86                | C <sub>4</sub> H <sub>5</sub> NO               | 86391572  | 91.6  |
| 29 | 2-Ethyl-2,4,5-trimethyl-1,3-dioxolane | 22.27                | C <sub>8</sub> H <sub>16</sub> O <sub>2</sub>  | 1317870   | 64.8  |
| 30 | 3-Aminoacrylonitriles                 | 22.72                | C <sub>3</sub> H <sub>4</sub> N <sub>2</sub>   | 1673115   | 83.7  |
| 31 | Methylene-propanedinitrile            | 22.97                | C <sub>4</sub> H <sub>2</sub> N <sub>2</sub>   | 50292200  | 90.2  |
| 32 | 4-Pyridinecarbonitrile                | 23.32                | C <sub>6</sub> H <sub>4</sub> N <sub>2</sub>   | 18762264  | 96.6  |
| 33 | Acetyl                                | 23.75                | C <sub>11</sub> H <sub>12</sub> N <sub>2</sub> | 636939    | 80.3  |
| 34 | 3-Pyridinecarbonitrile                | 24.69                | C <sub>6</sub> H <sub>4</sub> N <sub>2</sub>   | 920290854 | 95.6  |
| 35 | 2-Pentenedinitrile                    | 24.87                | C <sub>5</sub> H <sub>4</sub> N <sub>2</sub>   | 1303435   | 79.4  |
| 36 | 2-Butanone, 3-hydroxy-                | 25.07                | C <sub>4</sub> H <sub>8</sub> O <sub>2</sub>   | 3650907   | 90.1  |
| 37 | Pentanedinitrile                      | 25.40                | C <sub>5</sub> H <sub>6</sub> N <sub>2</sub>   | 1527576   | 92.3  |

---

|    |                               |       |                                                |           |      |
|----|-------------------------------|-------|------------------------------------------------|-----------|------|
| 38 | Butanedinitrile               | 26.06 | C <sub>4</sub> H <sub>4</sub> N <sub>2</sub>   | 173724896 | 96.3 |
| 39 | 2,3-Dimethyl- butanedinitrile | 26.39 | C <sub>6</sub> H <sub>8</sub> N <sub>2</sub>   | 1140163   | 86.6 |
| 40 | 2-Methyl- pentanedinitrile    | 26.57 | C <sub>6</sub> H <sub>8</sub> N <sub>2</sub>   | 750944    | 72.9 |
| 41 | 2-Pyrimidinol                 | 26.70 | C <sub>4</sub> H <sub>4</sub> N <sub>2</sub> O | 13599489  | 81.3 |
| 42 | 4-(Aminomethyl)pyridine       | 27.64 | C <sub>6</sub> H <sub>8</sub> N <sub>2</sub>   | 2807082   | 71.8 |
| 43 | 3-Imidazol-1-ylpropanenitrile | 29.41 | C <sub>6</sub> H <sub>7</sub> N <sub>3</sub>   | 8745363   | 87.9 |
| 44 | 3-Pyridineacetonitrile        | 31.39 | C <sub>7</sub> H <sub>6</sub> N <sub>2</sub>   | 3206225   | 93.7 |
| 45 | 1,3,8-Triazanaphthalene       | 31.96 | C <sub>7</sub> H <sub>5</sub> N <sub>3</sub>   | 1384103   | 81.9 |
| 46 | 1,4-Benzenedicarbonitrile     | 32.32 | C <sub>8</sub> H <sub>4</sub> N <sub>2</sub>   | 6759239   | 94.5 |
| 47 | 1,3-Benzenedicarbonitrile     | 32.57 | C <sub>8</sub> H <sub>4</sub> N <sub>2</sub>   | 6676888   | 96.1 |
| 48 | 2,3-Dicyanopropionamide       | 33.00 | C <sub>5</sub> H <sub>5</sub> N <sub>3</sub> O | 18812023  | 85.1 |

---
